# Supplementary material for: Impact of accelerometer data processing decisions on the sample size, wear time and physical activity level of a large cohort study
Source: PubMed Central journal article supplement (PMC4247661; doi:10.1186/1471-2458-14-1210), 2014-11-24
Supplement: 12889_2014_7313_MOESM1_ESM.pdf [file 12889_2014_7313_MOESM1_ESM.pdf]

Study ID: «ID\_»

Activity Monitor Log

\*«ID\_»\*

| Day | Circle the Day of the Week | Date monitor put on     | Time out of bed in the morning | Time monitor put on in the morning | Time monitor removed at night | Time into bed for the night  | List times during the day the monitor was not worn and state reason for not wearing it (e.g., showering). Any additional comments? |
|-----|----------------------------|-------------------------|--------------------------------|------------------------------------|-------------------------------|------------------------------|------------------------------------------------------------------------------------------------------------------------------------|
| 1   | M T<br>W TH<br>F SA<br>SU  | ___/___/___<br>mm/dd/yy | ___ : ___ am<br>___ : ___ pm   | ___ : ___ am<br>___ : ___ pm       | ___ : ___ am<br>___ : ___ pm  | ___ : ___ am<br>___ : ___ pm | _____<br>_____<br>_____                                                                                                            |
| 2   | M T<br>W TH<br>F SA<br>SU  | ___/___/___             | ___ : ___ am<br>___ : ___ pm   | ___ : ___ am<br>___ : ___ pm       | ___ : ___ am<br>___ : ___ pm  | ___ : ___ am<br>___ : ___ pm | _____<br>_____<br>_____                                                                                                            |
| 3   | M T<br>W TH<br>F SA<br>SU  | ___/___/___             | ___ : ___ am<br>___ : ___ pm   | ___ : ___ am<br>___ : ___ pm       | ___ : ___ am<br>___ : ___ pm  | ___ : ___ am<br>___ : ___ pm | _____<br>_____<br>_____                                                                                                            |
| 4   | M T<br>W TH<br>F SA<br>SU  | ___/___/___             | ___ : ___ am<br>___ : ___ pm   | ___ : ___ am<br>___ : ___ pm       | ___ : ___ am<br>___ : ___ pm  | ___ : ___ am<br>___ : ___ pm | _____<br>_____<br>_____                                                                                                            |
| 5   | M T<br>W TH<br>F SA<br>SU  | ___/___/___             | ___ : ___ am<br>___ : ___ pm   | ___ : ___ am<br>___ : ___ pm       | ___ : ___ am<br>___ : ___ pm  | ___ : ___ am<br>___ : ___ pm | _____<br>_____<br>_____                                                                                                            |
| 6   | M T<br>W TH<br>F SA<br>SU  | ___/___/___             | ___ : ___ am<br>___ : ___ pm   | ___ : ___ am<br>___ : ___ pm       | ___ : ___ am<br>___ : ___ pm  | ___ : ___ am<br>___ : ___ pm | _____<br>_____<br>_____                                                                                                            |
| 7   | M T<br>W TH<br>F SA<br>SU  | ___/___/___             | ___ : ___ am<br>___ : ___ pm   | ___ : ___ am<br>___ : ___ pm       | ___ : ___ am<br>___ : ___ pm  | ___ : ___ am<br>___ : ___ pm | _____<br>_____<br>_____                                                                                                            |

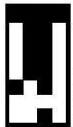

8127

Thank you for completing this form. Please return it with the activity monitor.

OFFICE USE ONLY    ○ 1   ○ 2   ○ 3
